# Supplementary material for: Phytochemical Discrimination, Biological Activity and Molecular Docking of Water-Soluble Inhibitors from Saussurea costus Herb against Main Protease of SARS-CoV-2
Source: MDPI journal article supplement (doi:10.3390/molecules27154908), 2022-08-01
Supplement: s1 [file s1]

# Phytochemical discrimination and molecular docking of water-soluble inhibitors from *saussurea costus* herb against main protease of SARS-CoV-2

Hajo Idriss <sup>1,2</sup>, Babeker Siddig <sup>3,4</sup>, Pamela Gonzalez Maldonado <sup>5</sup>, H. M. Elkhair <sup>1</sup>, A. I. Alakhras <sup>1,6</sup>, Emad M. Abdallah <sup>7</sup>, Pablo Hernán Sotelo<sup>5</sup>, and Amin O. Elzupir <sup>1,2,\*</sup>

- <sup>1</sup> Deanship of Scientific Research, Imam Mohammad Ibn Saud Islamic University (IMSIU), P.O. Box 90905 Riyadh, 11623 Saudi Arabia; hiidriss@imamu.edu.sa (H.I.); hmdirar@imamu.edu.sa (H.M.E.); aakhrasi@imamu.edu.sa (A.I.A.)
- <sup>2</sup> Department of Physics, College of Science, Imam Mohammad Ibn Saud Islamic University (IMSIU), P.O. Box 90905 Riyadh, 11623 Saudi Arabia
- <sup>3</sup> Alawia Imam Institute for Pharmaceutical Research and Development, University of Medical Science and Technology, Khartoum, 11115 Sudan; gcfid@savola.com
- <sup>4</sup> Savola Edible Oils, Khartoum, 11115 Sudan
- <sup>5</sup> Biotechnology Department, Facultad de Ciencias Químicas, Universidad Nacional de Asunción, San Lorenzo 111421, Paraguay; pame.54.pg12@gmail.com (P.G.M.); phsotelo@qui.una.py (P.H.S)
- <sup>6</sup> Department of Chemistry, College of Science, Imam Mohammad Ibn Saud Islamic University (IMSIU), Riyadh, Saudi Arabia
- <sup>7</sup> Department of Science Laboratories, College of Science and Arts, Qassim University, Ar Rass 51921, Saudi Arabia; emad100sdl@yahoo.com
- \* Correspondence: aolamalhuda@imamu.edu.sa

**Table S1.** GC-MS discrimination of phytochemicals from water-extract of *saussurea costus*.

| No  | Compound name                                       | Ret.Time | Area    | Area% | Classification  |
|-----|-----------------------------------------------------|----------|---------|-------|-----------------|
| 1.  | 2,4-Dihydroxy-2,5-dimethyl-3(2H)-furan-3-one        | 3.565    | 835809  | 0.73  | Carbohydrate    |
| 2.  | 1,3-Dioxol-2-one,4,5-dimethyl-                      | 4.256    | 1107090 | 0.96  | Carbohydrate    |
| 3.  | 2,5-Dimethyl-4-hydroxy-3(2H)-furanone               | 4.516    | 2073246 | 1.80  | Carbohydrate    |
| 4.  | Maltol                                              | 4.758    | 2641563 | 2.30  | Tannins         |
| 5.  | 2(3H)-Furanone, 5-heptyldihydro-                    | 4.916    | 620539  | 0.54  | Carbohydrate    |
| 6.  | Pentanoic acid, 4-oxo-                              | 5.180    | 1205524 | 1.05  | Carboxylic acid |
| 7.  | 4H-Pyran-4-one, 2,3-dihydro-3,5-dihydroxy-6-methyl- | 5.605    | 8504711 | 7.40  | Carbohydrate    |
| 8.  | 5-Oxotetrahydrofuran-2-carboxylic acid, ethyl ester | 5.843    | 277841  | 0.24  | Fatty acid      |
| 9.  | Benzoic acid                                        | 5.943    | 218627  | 0.19  | Carboxylic acid |
| 10. | 2-Hexanone, 3,3-dimethyl-                           | 6.000    | 286844  | 0.25  | Hydrocarbon     |

|     |                                                                                                                                 |        |          |      |                   |
|-----|---------------------------------------------------------------------------------------------------------------------------------|--------|----------|------|-------------------|
| 11. | 4H-Pyran-4-one, 3,5-dihydroxy-2-methyl-                                                                                         | 6.168  | 329914   | 0.29 | Carbohydrate      |
| 12. | Catechol                                                                                                                        | 6.440  | 489444   | 0.43 | Tannins           |
| 13. | 5-Hydroxymethylfurfural                                                                                                         | 6.502  | 3022022  | 2.63 | Carbohydrate      |
| 14. | 1,2,3-Propanetriol, 1-acetate                                                                                                   | 6.736  | 3959968  | 3.45 | Tannins           |
| 15. | Cyclobutanecarboxylic acid, 2-tridecyl ester                                                                                    | 7.417  | 2788842  | 2.43 | Fatty acid        |
| 16. | 1,3-Propanediol, 2-(hydroxymethyl)-2-nitro-                                                                                     | 9.583  | 10089211 | 8.78 | Tannins           |
| 17. | 4,5-Heptadien-2-one, 3,3,6-trimethyl-                                                                                           | 12.618 | 886867   | 0.77 | Terpenoid         |
| 18. | 4-((1E)-3-Hydroxy-1-propenyl)-2-methoxyphenol                                                                                   | 12.826 | 131120   | 0.11 | Phenolic Compound |
| 19. | Tetradecanoic acid                                                                                                              | 13.335 | 291448   | 0.25 | Fatty acid        |
| 20. | 2(3H)-Benzofuranone, 6-ethenylhexahydro-3,6-dimethyl-7-(1-methylethenyl)-, [3S-(3.alpha.,3a.alpha.,6.alpha.,7.beta.,7a.beta.)]- | 13.605 | 170727   | 0.15 | Carbohydrate      |
| 21. | Benzyl oxy tridecanoic acid                                                                                                     | 14.080 | 88542    | 0.08 | Carboxylic acid   |
| 22. | Tricyclo[4.2.2.0(2,5)]dec-7-ene, 7-(5-hexynyl)-                                                                                 | 14.288 | 143374   | 0.12 | Terpenoid         |
| 23. | .alpha.-Bulnesene                                                                                                               | 14.411 | 532204   | 0.46 | Terpenoid         |
| 24. | Cyclodecacyclotetradecene, 14,15-didehydro-1,4,5,8,9,10,11,12,13,16,17,18,19,20-tetradecahydro-                                 | 14.982 | 1504459  | 1.31 | Hydrocarbon       |
| 25. | (-)-Spathulenol                                                                                                                 | 15.068 | 906977   | 0.79 | Terpenoid         |
| 26. | n-Hexadecanoic acid                                                                                                             | 15.386 | 6325410  | 5.50 | Fatty acid        |
| 27. | Bicyclo[4.1.0]heptane, 7-bicyclo[4.1.0]hept-7-ylidene-                                                                          | 15.483 | 672778   | 0.59 | Terpenoid         |
| 28. | Pregnan-20-one, 3-hydroxy-                                                                                                      | 15.828 | 429400   | 0.37 | Sterol            |
| 29. | Caryophyllene oxide                                                                                                             | 15.946 | 218763   | 0.19 | Terpenoid         |
| 30. | 4-epi-cubedol                                                                                                                   | 16.118 | 323009   | 0.28 | Terpenoid         |
| 31. | 1,2-15,16-Diepoxyhexadecane                                                                                                     | 16.475 | 177023   | 0.15 | Hydrocarbon       |

|     |                                                                           |        |          |       |                   |
|-----|---------------------------------------------------------------------------|--------|----------|-------|-------------------|
| 32. | 9,12-Octadecadienoic acid (Z,Z)-, methyl ester                            | 16.605 | 628109   | 0.55  | Fatty acid        |
| 33. | 9-Octadecenoic acid (Z)-, methyl ester                                    | 16.685 | 556434   | 0.48  | Fatty acid        |
| 34. | 4,8,13-Cyclotetradecatriene-1,3-diol, 1,5,9-trimethyl-12-(1-methylethyl)- | 16.769 | 374016   | 0.33  | Hydrocarbon       |
| 35. | Andrographolide                                                           | 16.844 | 105269   | 0.09  | Terpenoid         |
| 36. | 9,12-Octadecadienoic acid (Z,Z)-, methyl ester                            | 16.980 | 25545692 | 22.23 | Fatty acid        |
| 37. | 9-Octadecenoic acid, (E)-                                                 | 17.055 | 26043197 | 22.67 | Fatty acid        |
| 38. | Octadecanoic acid                                                         | 17.257 | 2943518  | 2.56  | Fatty acid        |
| 39. | Linoleic acid ethyl ester                                                 | 17.695 | 3445088  | 3.00  | Fatty acid        |
| 40. | (-)-Spathulenol                                                           | 18.039 | 466724   | 0.41  | Terpenoid         |
| 41. | cis-13-Eicosenoic acid                                                    | 18.733 | 133887   | 0.12  | Fatty acid        |
| 42. | .delta.4-Androstene-3.beta.,17.beta.-diol                                 | 19.351 | 185696   | 0.16  | Sterol            |
| 43. | (Z)6,(Z)9-Pentadecadien-1-ol                                              | 19.703 | 393634   | 0.34  | Terpenoid         |
| 44. | 9-Octadecenoic acid, 1,2,3-propanetriyl ester, (E,E,E)-                   | 19.759 | 270387   | 0.24  | Fatty acid        |
| 45. | Hexadecanoic acid, 2-hydroxy-1-(hydroxymethyl)ethyl ester                 | 19.967 | 653760   | 0.57  | Fatty acid        |
| 46. | Docosanoic acid                                                           | 20.546 | 918087   | 0.80  | Fatty acid        |
| 47. | Phenol, 2,6-dimethoxy-4-(2-propenyl)-                                     | 21.201 | 119649   | 0.10  | Phenolic Compound |
| 48. | .beta.-Sitosterol                                                         | 26.024 | 876719   | 0.76  | Sterol            |
